# Supplementary material for: Strand Invasion Based Amplification (SIBA®): A Novel Isothermal DNA Amplification Technology Demonstrating High Specificity and Sensitivity for a Single Molecule of Target Analyte
Source: PubMed Central journal article supplement (PMC4242538; doi:10.1371/journal.pone.0112656), 2014-11-24
Supplement: pone.0112656.s003.pdf [file pone.0112656.s003.pdf]

## Supporting information S3

### Schematic representation of SIBA primers and the invasion oligonucleotide (IO) used in the (A) artificial and (B) *Salmonella* InvA gene amplification systems.

#### A. SIBA artificial system

CTAGAGTCATGTGTAGTTGAC **R-primer**  
**TTGTCCATAGACTG**CTCGACCTGATACACGTTATCGTCCATACGGAT *UCGGGAUCUCAUA*/InvdT/-**IO**  
AACAAGAAGGCGTACTCGACCTGATACACGTTATCGTCCATACGGATTCGGGATCTCAGTACACATCAACTG-**Target DNA**  
AACAAGAAGGCGTACTCGACC **F-primer**

#### B. SIBA *Salmonella* InvA system

GTTGCAAAGGACGCCA-**R-primer**  
**TCCTCCTGTACCTTG**TGTTTATGGGGTCGTTCTACATTGACAGAAT *CCUCAGUUUUCAACGA*/InvdT/-**IO**  
TACTGGCGATATTGGTGTGTTTATGGGGTCGTTCTACATTGACAGAATCCTCAGTTTTTCAACGTTTCCTGCGGTA-**Target DNA**  
CTGGCGATATTGGTGTTT **F-primer**

Figure S3. Schematic representation of the SIBA primers and invasion oligonucleotide (IO) used in (A) artificial system or (B) the *Salmonella* InvA gene. The underlined region of the primer is the sequence that is homologous to the IO. The highlighted region of the IO (marked in italics) is modified with 2'-O-methyl RNA. The bold sequence within the IO represents the region that is non-homologous to the target DNA (seeding region).
