# Supplementary material for: Strand Invasion Based Amplification (SIBA®): A Novel Isothermal DNA Amplification Technology Demonstrating High Specificity and Sensitivity for a Single Molecule of Target Analyte
Source: PubMed Central journal article supplement (PMC4242538; doi:10.1371/journal.pone.0112656), 2014-11-24
Supplement: pone.0112656.s009.pdf [file pone.0112656.s009.pdf]

**Table S1.** Oligonucleotides used in this study

## Primers

### Primers for the SIBA artificial system

|              |                                              |
|--------------|----------------------------------------------|
| SB-F30       | TGCCAATCCAACAAGAAGGCGT <u>ACTCGACC</u>       |
| SB-F35       | CAATTTGCCAATCCAACAAGAAGGCGT <u>ACTCGACC</u>  |
| SB-F21       | AACAAGAAGGCGT <u>ACTCGACC</u>                |
| SB-F21 NHOM1 | TGCCAATCCAACAAGAAGGCG                        |
| SB-F18       | CAAGAAGGCGT <u>ACTCGAC</u>                   |
| SB-F16       | CAAGAAGGCGT <u>ACTCG</u>                     |
| SB-F17       | TGATGTGT <u>ACTGAGATC</u>                    |
| SB-F14       | AACAAGAAGGCGTA                               |
| SB-R30       | GCAATGAGCTCAGTTGATGTGT <u>ACTGAGATC</u>      |
| SB-R35       | ACCATGCAATGAGCTCAGTTGATGTGT <u>ACTGAGATC</u> |
| SB-R21       | CAGTTGATGTGT <u>ACTGAGATC</u>                |
| SB-R21 NHOM1 | ATGAGCTCAGTTGATGTGTAC                        |
| SB-R21 NHOM2 | GCAATGAGCTCAGTTGATGTG                        |
| SB-R18       | TTGATGTGT <u>ACTGAGATC</u>                   |
| SB-R16       | TTGATGTGT <u>ACTGAGA</u>                     |
| SB-R14       | TGTGT <u>ACTGAGATC</u>                       |

**Primers used for the *Salmonella* system**

**SM-F18** CTGGCGATATTGGTGTTT

**SM-R16** ACCGCAGGAAACGTTG

Regions homologous to the IO are underlined.

**Templates**

**Template used for the SIBA artificial system**

**SB-TEMPLATE LONG**

CAATTTGCCAATCCAACAAGAAGGCGTACTCGACCTGATACACGTTATCGTCCATACGGATTCGGG  
ATCTCAGTACACATCAACTGAGCTCATTGCATGGT

**SB-TEMPLATE**

AACAAGAAGGCGTACTCGACCTGATACACGTTATCGTCCATACGGATTCGGGATCTCAGTACACAT  
CAACTG

**Non-homologous template used for the SIBA artificial system**

**SB NHOM Template**

TACTGGCGATATTGGTGTTTTTATGGCGTCCTTCTACAAAGACAGAATCCTCTCTTTTTCAACGTTTC  
CTGCGGTA

**Templates (harboring point mutations) used for the SIBA artificial system specificity test**

**Point mutations located in regions homologous to the IO 2'-O-methyl RNA region**

**SB-MET1 TEMPLATE**

AACAAGAAGGCGTACTCGACCTGATACACGTTATCGTCCATACGGATT**C**GGATCTCAGTACACAT  
CAACTG

**SB-MET2 TEMPLATE**

AACAAGAAGGCGTACTCGACCTGATACACGTTATCGTCCATACGGATT**CC**GATCTCAGTACACAT  
CAACTG

**SB-MET3 TEMPLATE**

AACAAGAAGGCGTACTCGACCTGATACACGTTATCGTCCATACGGATT**GCC**GATCTCAGTACACAT  
CAACTG

**SB-MET4 TEMPLATE**

AACAAGAAGGCGTACTCGACCTGATACACGTTATCGTCCATACGGAT**TGCC**GATCTCAGTACACAT  
CAACTG

**Point mutations located in regions homologous to the IO-DNA region**

**SB-DNA1 TEMPLATE**

AACAAGAAGGCGTACTCGACCT**C**ATACACGTTATCGTCCATACGGATT**C**GGATCTCAGTAC  
ACATCAACTG

**SB-DNA2 TEMPLATE**

AACAAGAAGGCGTACTCGACCT**C**ATACACGTTATCGTCC**T**TACGGATT**C**GGATCTCAGTAC  
ACATCAACTG

**SB-DNA3 TEMPLATE**

AACAAGAAGGCGTACTCGACCT**C**ATACAC**C**TTATCGTCC**T**TACGGATT**C**GGATCTCAGTAC  
ACATCAACTG

**SB-DNA4 TEMPLATE**

AACAAGAAGGCGTACTCGACCT**C**ATACAC**C**TT**A**CGTCC**T**TACGGATT**C**GGATCTCAGTAC  
ACATCAACTG

Point mutations are underlined and in bold.

## Invasion oligonucleotide (IO) sequences used in the SIBA artificial system

### IO used for the artificial system

#### SB-IO

TTGTCCATAGACTG CTCGACCTGATACACGTTATCGTCCATACGGAT

mUmCmGmGmGmAmUmCmUmCmAmUmA /InvdT/

#### SB-IO NON-METH

TTGTCCATAGACTG CTCGACCTGATACACGTTATCGTCCATACGGAT TCGG TA /InvdT/

#### SB-IO-DNA

TTGTCCATAGACTG CTCGACCTGATACACGTTATCGTCCATACGGATTTCGGGATCTCA TA

/InvdT/

#### SB-IO DIFF-METH

TTGTCCATAGACTG CTCGACCTGATACACGTTATCGTCCATACGGAT

mAmGmCmCmCmUmCmAmGmAmGmUmA /InvdT/

The IO non-homologous region (5'-end) is underlined.

m = 2'-O-methyl RNA nucleotides.

/InvdT/ = inverted dT.

### Non-homologous IO used for specificity evaluation

#### SB NHOM IO

TCCTCCTGTACCTT GTGTTTATGGGGTCGTTCTACATTGACAGAATCCT

mCmAmGmUmUmUmUmUmCmAmAmCmGmA /InvdT/

IO non-homologous region (5'-end) is underlined.

m = 2'-O-methyl RNA nucleotides.

/InvdT/ = inverted dT.

**Invasion oligonucleotide (IO) sequence used for the *Salmonella* system****SM-IO**

TCCTCCTCTTCCTT TGTTTATGGGGTCGTTCTACATTGACAGAATC  
 mCmUmCmAmGmUmUmUmUmUmCmAmAmCmGmA / InvdT /

The IO non-homologous region (5'-end) is underlined.

m = 2'-O-methyl RNA nucleotides.

/InvdT/ = inverted dT.

***Oligonucleotides used in the strand exchange experiment***

|              |                                                   |
|--------------|---------------------------------------------------|
| <b>SX 16</b> | GAGTACACATGAAGTG                                  |
| <b>SX 21</b> | CTACTGAGTACACATGAAGTG                             |
| <b>SX 25</b> | AGCCCTACTGAGTACACATGAAGTG                         |
| <b>SX 35</b> | GCATACCGATAGCCCTACTGAGTACACATGAAGTG               |
| <b>SX 40</b> | ATCGTGCATACCGATAGCCCTACTGAGTACACATGAAGTG          |
| <b>SX 49</b> | ATAGACGTAATCGTGCATACCGATAGCCCTACTGAGTACACATGAAGTG |

SX 16–49 were labeled (or not) with TAMRA at the 3'-end.

**INVASION TEMPLATE**

/FAM/CACTTCATGTGTACTCAGTAGGGCTATCGGTATGCACGATTACGTCTATG

***Invasion oligonucleotide (IO) sequence used for the invasion strand exchange assay*****IO-LONG**

TTGTCCATAGACTG CTGCACCTCATAGACGTAATCGTGCATACCGATAGCCCTACTGA  
 GTACACATGA TA /InvdT/

**IO-DNA**

TTGTCCATAGACTG CTGCACCTCATAGACGTAATCGTGCATACCGATAGCCCTACTGATA

*/InvdT/*

**IO-MET**

*TTGTCCATAGACTG CTGCACCTCATAGACGTAATCGTGCATACCGAT*  
*AmGmCmCmCmTmAmCmTmGmAmTmA /InvdT/*

**IO DIFF-MET**

*TTGTCCATAGACTG CTGCACCTCATAGACGTAATCGTGCATACCGAT A*  
*mCmAmUmGmAmUmGmAmAmGmCmU /InvdT/*

*The IO non-homologous region (5'-end) is underlined.*

*m = 2'-O-methyl RNA nucleotides.*

*/InvdT/ = inverted dT.*

***Duplex used for the invasion strand exchange assay***

**Duplex SHORT**

*AACAAGAAGGCGTACTGCACCTCATAGACGTAATCGTGCATACCGATAGCCCTACTGAGTACACAT*  
*GAAGTG/TAMRA/*  
*/FAM/CACTTCATGTGTACTCAGTAGGGCTATCGGTATGCACGATTACGTCTATGAGGTGCAGTAC*  
*GCCTTCTTGTT*

**Duplex LONG**

*AACAAGAAGGCGTACTGCACCTCATAGACGTAATCGTGCATACCGATAGCCCTACTGAGTACACAT*  
*GAAGTGAGTTCAGCAG/TAMRA/*  
*/FAM/CTGCTGAACTCACTTCATGTGTACTCAGTAGGGCTATCGGTATGCACGATTACGTCTATGA*  
*GGTGCAGTACGCCTTCTTGTT*
