# Supplementary material for: Strand Invasion Based Amplification (SIBA®): A Novel Isothermal DNA Amplification Technology Demonstrating High Specificity and Sensitivity for a Single Molecule of Target Analyte
Source: PubMed Central journal article supplement (PMC4242538; doi:10.1371/journal.pone.0112656), 2014-11-24
Supplement: pone.0112656.s010.pdf [file pone.0112656.s010.pdf]

**Table S2.** Bacterial strains used in this study

| <b><i>Salmonella</i> strain used for the SIBA <i>Salmonella</i> assay sensitivity test</b> | <b>Bacterial mix used for the SIBA <i>Salmonella</i> assay specificity test</b>                                                                                                                                                                                                                                                                                                                                                                                                                                                                                                                                                       |
|--------------------------------------------------------------------------------------------|---------------------------------------------------------------------------------------------------------------------------------------------------------------------------------------------------------------------------------------------------------------------------------------------------------------------------------------------------------------------------------------------------------------------------------------------------------------------------------------------------------------------------------------------------------------------------------------------------------------------------------------|
| <i>Salmonella typhimurium</i> ATCC 14028                                                   | <i>Enterobacter aerogenes</i> ATCC13048<br><i>Citrobacter sp.</i><br><i>Shigella sonnei</i> ATCC25931<br><i>Shigella flexneri</i><br><i>Streptococcus agalactiae</i> (B) ATCC12386<br><br><i>Streptococcus agalactiae</i> (B) ATCC27956<br><i>Listeria monocytogenes</i> NCTC11994<br><i>Escherichia coli</i> ATCC25922<br><i>Enterobacter aerogenes</i> ATCC15038<br><i>Enterobacter cloacae</i> 118/1986<br><br><i>Enterobacter aerogenes</i> NCTC1006<br><i>Enterobacter spp.</i> (Paper Mill isolate)<br><i>Enterococcus faecalis</i> ATCC29212<br><i>Citrobacter freundii</i> ATCC8090<br><i>Klebsiella pneumoniae</i> ATCC13883 |
